# Supplementary figures and images for: The Secretome and N-Glycosylation Profiles of the Charophycean Green Alga, Penium margaritaceum, Resemble Those of Embryophytes
Source: MDPI journal article supplement (doi:10.3390/proteomes6020014), 2018-03-21

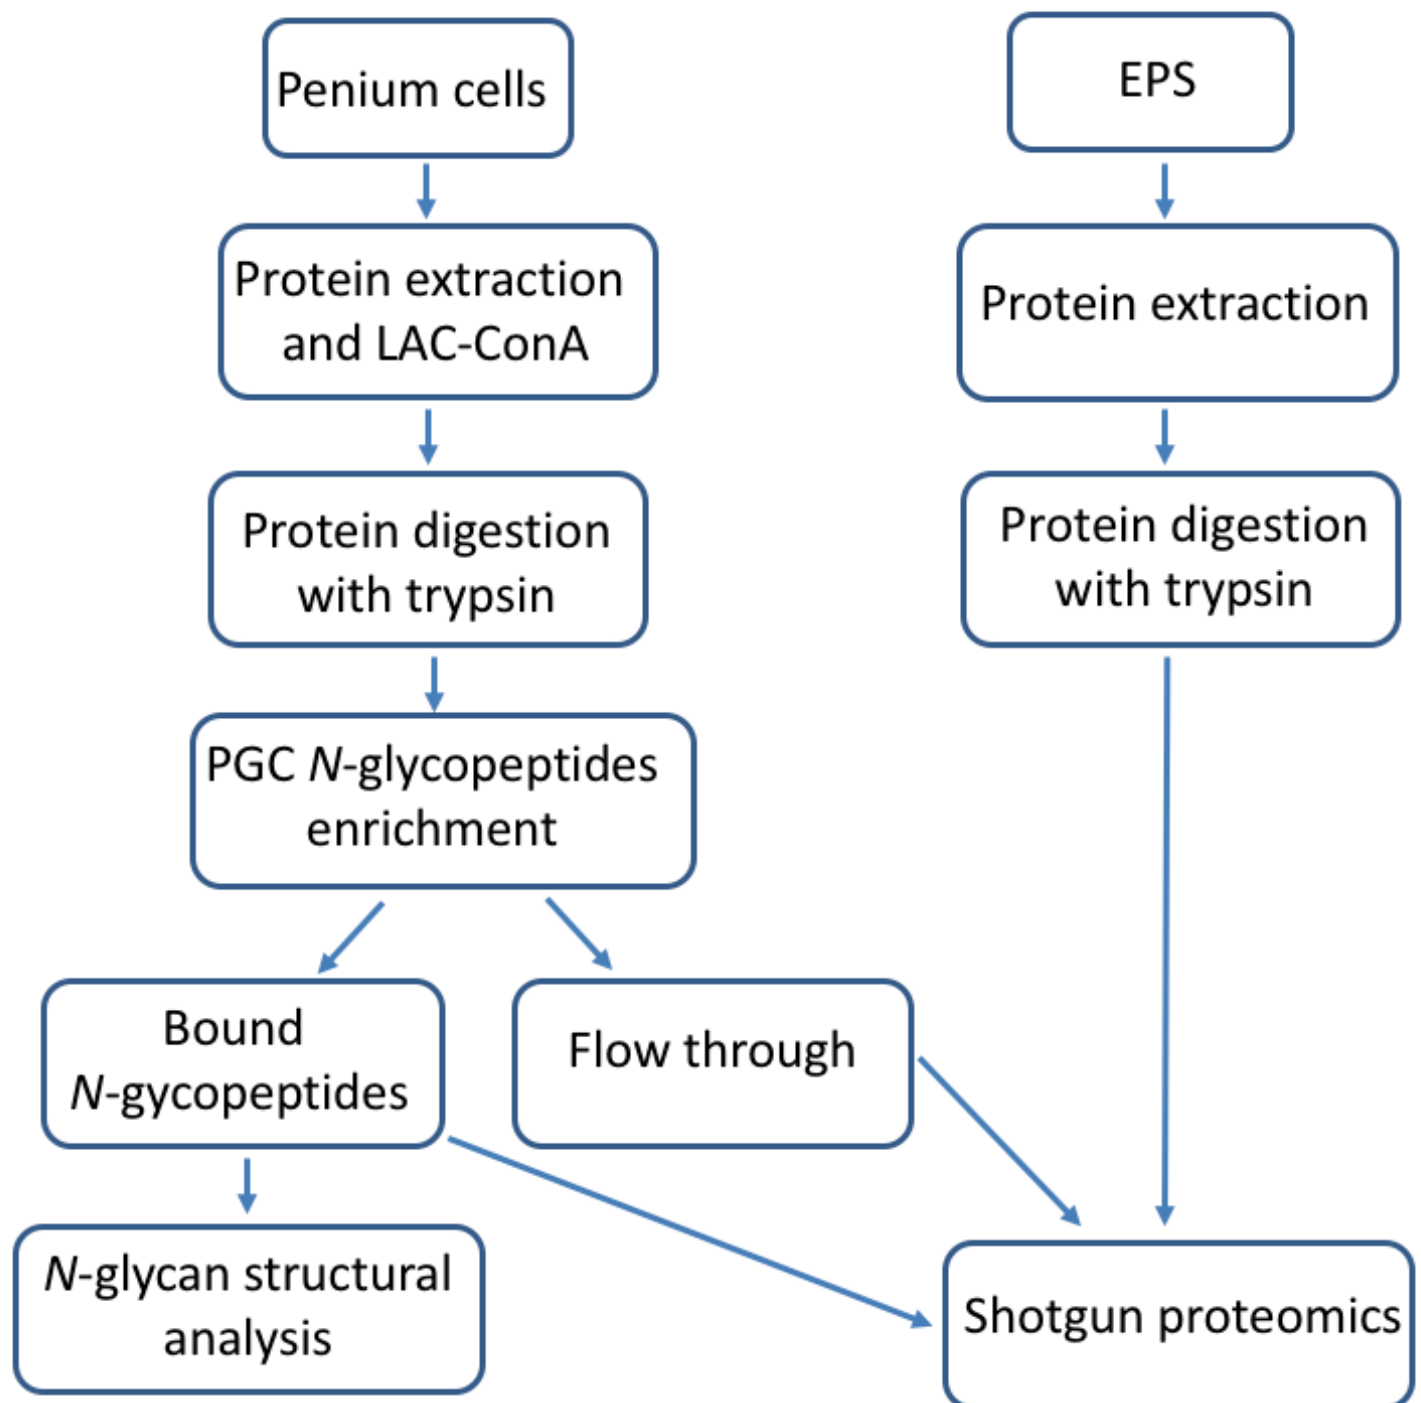

Supplement: s1 [file s1]
